# Supplementary material for: Thiol Based Redox Signaling in Plant Nucleus
Source: Front Plant Sci. 2018 May 28;9:705. doi: 10.3389/fpls.2018.00705 (PMC5985474; doi:10.3389/fpls.2018.00705)
Supplement: Supplementary file 1 [file Table_1.XLS]

## Sheet: Legend
Supplemental Table 1. Putative nuclear Trx targets identifed by affinity chromatography and reductome approaches in C. reinhardtii (adapted from Pérez-Pérez et al., 2017)
Accession number: accession number in UniprotKB protein database.
Technique: proteins identified by affinity chromatography or reductome approaches or both.
TRX: Proteins found as Trx targets in C. reinhardtii. (Lemaire et al. (2004) New Trx targets in the unicellular photosynthetic eukaryote Chlamydomonas reinhardtii. Proc. Natl. Acad. Sci.101, 7475-7480)
S-SG: Cysteines found as glutathionylated in C. reinhardtii. (Zaffagnini et al. (2012) Glutathionylation in the photosynthetic model organism Chlamydomonas reinhardtii: a proteomic survey. Mol Cell Proteomics. 11, M111.014142)
S-NO: Cysteines found as nitrosylated in C. reinhardtii. (Morisse et al. (2014) Insight into protein nitrosylation in Chlamydomonas reinhardtii. Antioxid Redox Signal. 21, 1271-1284)
KEGG: Functionnal annotation of proteins according to the KYOTO Encyclopedia of Genes and Genomes

## Sheet: Full list
Description	Accesion number	Gene name	TRX	S-SG	S-NO	KEGG
Transcriptional coactivator-like protein	A8J724	TSN1				Transcription
DExD/H-box RNA helicase, cytoplasmic	A8IT25	DEH1				Replication and repair
G strand binding-protein 1/telomere binding-protein	Q39568	gbp1			û	Replication and repair
Proliferating cell nuclear antigen	A8JHX0	PCN1				Replication and repair
3'-5' exoribonuclease	A8IX13	RNB1				Replication and repair
High mobility group protein	A8HQE3					Replication and repair
Nucleosome assembly protein	A2BCY1	cnapl				Replication and repair
Nucleosome assembly protein	A8J513					Replication and repair
Replication protein A, 70 kDa DNA-binding subunit	A8JII8	RPA70A				Replication and repair
UV-damaged DNA binding complex subunit 1 protein	A8IB70	DDB1				Replication and repair
DNA helicase (Minichromosome maintenance protein 5)	A8HPZ4	MCM5				Replication and repair
DNA polymerase delta small subunit	A8IZH0	POLD2				Replication and repair
Minichromosome maintenance protein 6	A8IDL8	MCM6				Replication and repair
Ribonucleoside-diphosphate reductase (RNR) large chain	A8JDR3	RIR1				Replication and repair
Ribonucleoside-diphosphate reductase (RNR) small chain	A8ILR9	RIR2A				Replication and repair
Heat shock protein 70B	Q39603	hsp70b	û	û	û	Folding, sorting and degradation
Heat shock protein 70E	A8J3P5	HSP70E		û	û	Folding, sorting and degradation
Heat shock protein 90A	A8J1U1	HSP90A		û	û	Folding, sorting and degradation
Heat shock protein 90B	A8I7T1	HSP90B		û	û	Folding, sorting and degradation
Heat shock protein 90C	Q66T67	HSP90C		û	û	Folding, sorting and degradation
T-complex protein 1 subunit alpha	A8IIP9	CCT1			û	Folding, sorting and degradation
T-complex protein 1 subunit delta	A8JE04	CCT4				Folding, sorting and degradation
T-complex protein 1 subunit gamma	A8II42	CCT3			û	Folding, sorting and degradation
T-complex protein 1, beta subunit	A8J524	CCT2				Folding, sorting and degradation
T-complex protein, epsilon subunit	A8J7J2	CCT5			û	Folding, sorting and degradation
T-complex protein, eta subunit	A8HQ74	CCT7				Folding, sorting and degradation
DnaJ-like protein	A8HXK0	DNJ6				Folding, sorting and degradation
T-complex protein, theta subunit	A8IF08	CCT8			û	Folding, sorting and degradation
T-complex protein, zeta subunit	A8J014	CCT6				Folding, sorting and degradation
TPR protein	A8IPD5					Folding, sorting and degradation
Glyceraldehyde-3-phosphate dehydrogenase, cytosol-nucleus	P49644	GAPC				Carbohydrate metabolism
Histone deacetylase	A8J122					Amino acid metabolism
Histone methyltransferase	A8HTU8					Amino acid metabolism
26S proteasome regulatory subunit	A8IR87	RPN12	û			Folding, sorting and degradation
20S proteasome alpha subunit E	A8J6K9	POA5			û	Folding, sorting and degradation
26S proteasome regulatory subunit	A8J3A4	RPN1		û		Folding, sorting and degradation
26S proteasome regulatory subunit	A8J8U1	RPN10				Folding, sorting and degradation
26S proteasome regulatory subunit	A8J6S7	RPN2				Folding, sorting and degradation
26S proteasome regulatory subunit	A8IIP7	RPT5				Folding, sorting and degradation
26S proteasome regulatory subunit	A8IR41	RPT4		û		Folding, sorting and degradation
26S proteasome regulatory subunit	A8IV67	RPT1			û	Folding, sorting and degradation
26S proteasome regulatory subunit	A8HVA6	RPN3				Folding, sorting and degradation
Casein kinase 2 alpha chain, CK2A	A8JF80					Translation
Exosome complex exonuclease	A8IUG4	RRP46				Folding, sorting and degradation
DNA-directed RNA polymerase II	Q1L5X1	RPB2				Transcription
Histone methyltransferase	A8JCM2					Translation
Nucleolar protein, component of C/D snoRNPs	A8IA86	NOP1				Transcription
Pre-mRNA splicing factor, component of splicing factor 3b, nuclear	A8JEV6					Transcription
SR protein factor	A8J4I2	RSZ22			û	Transcription
Subunit of exon junction complex	A8JIJ1	UAP56		û	û	Transcription
DEAH-box nuclear pre-mRNA splicing factor	A8JH75	SPLH2				Transcription
Heterogeneous nuclear ribonucleoprotein	A8JE98	HNR1			û	Transcription
Nucleolar protein, component of C/D snoRNPs	A8IID0	NOP58				Transcription
Ribonucleoprotein , nuclear	A8IBU6					Transcription
RNA helicase, activating signal cointegrator 1	A8JI25					Transcription
SF3A3 splicing factor 3a, subunit 3	A8IP78	SPL3				Transcription
Small nuclear ribonucleoprotein	A8I0E2	SMP1				Transcription
Small nuclear ribonucleoprotein Sm D2	A8I074	SMP4				Transcription
Small nuclear riboprotein, U6 sm-like protein	A8IFM6	LSM7				Transcription
Spliceosome component, nuclear pre-mRNA splicing factor	A8I9S6	PRP19			û	Transcription
SR protein factor	A8HQ72	SRP35				Transcription
U2 snRNP auxiliary factor, large subunit	A8J055	SPL8				Transcription
Transcription termination factor, mitochondrial	A8J9F6	MTT1			û	Transcription
Transcriptional regulator-like protein	A8HVN7	CGLD10				Transcription
Global transcription factor	A8JHE3				û	Transcription
Global transcription factor	A8HQJ4					Transcription
Glycine rich protein	A8J804					Transcription
Protein arginine N-methyltransferase	A8JGX5	PRMT2			û	Transcription
Ran-like small GTPase	A8IRX5	RAN1	û	û		Transport and catabolism
Importin beta, Armadillo/beta-catenin-like	A8IUL5	IPB2		û		Transport and catabolism
Importin beta, Armadillo/beta-catenin-like	A8HQU3	IPB1				Transport and catabolism
Importin subunit alpha, Armadillo/beta-catenin-like	A8J9Q1	IPA1				Transport and catabolism
RAN GTPase activating protein, RANGAP1	A8J750					Transport and catabolism
RAN binding protein, RANBP1	A8IZW5	RBP1				Transport and catabolism
Exportin	A8J2W2	XPO1		û		Transport and catabolism
Importin 7	A8HR57	ITN7				Transport and catabolism
Transportin	A8J5Y9	TRN1				Transport and catabolism
Ubiquitin activating enzyme E1	A8ILT1	UBC1				Folding, sorting and degradation
Ubiquitin carboxyl-terminal hydrolase	A8I7S0			û		Folding, sorting and degradation
Ubiquitin conjugating enzyme	A8JBJ3	UBC9				Folding, sorting and degradation
Ubiquitin-activating enzyme E1	A8J1C1	UBA1		û	û	Folding, sorting and degradation
E3 ubiquitin ligase	A8IJ79	SKP1		û		Folding, sorting and degradation
Ubiquitin carboxyl-terminal hydrolase	A8JCI5					Folding, sorting and degradation
Ubiquitin-conjugating enzyme E2	Q8VZX3	UBC2				Folding, sorting and degradation
Ubiquitin-like protein	A8J3A8					Folding, sorting and degradation
Ubiquitin conjugating enzyme family protein	A8IKM3	UBC21				Folding, sorting and degradation
Ubiquitin ligase SCF complex subunit cullin	A8I7H0	CUL1				Folding, sorting and degradation
Calcium-dependent protein kinase 1	A8IPQ9	CDPK1			û	Signal transduction
Dual specificity protein phosphatase 8	A8J2N4	DSP8				Signal transduction
Gliding motility related CaM kinase	Q6V8K6					Signal transduction
Mitogen-activated protein kinase 6	A8IKD6	MAPK6				Signal transduction
Protein phosphatase 2A regulatory subunit	A8J709	PPP36			û	Signal transduction
Protein phosphatase 2C	A8J4N7	PPP34				Signal transduction
Protein phosphatase 2C catalytic subunit	A8JBD8	PP2C2				Signal transduction
Protein phosphatase 2C-like protein	A8HQG8	PP2C4				Signal transduction
Serine/threonine-protein phosphatase	A8HNE3	PKL1				Signal transduction
Serine/threonine-protein phosphatase	Q9XGU3	PP1A				Signal transduction
Serine/threonine-protein phosphatase	A8IMP0	PPA1				Signal transduction
Serine/threonine-protein phosphatase 2A 55 kDa regulatory subunit B	A8JCR1	PP2A1			û	Signal transduction
Thioredoxin reductase	A8JFV6	NTR3
Glutathione peroxidase	O22448	GPX5	û		û
14-3-3 protein FTT1	P52908	FTT1		û	û	Signal transduction
14-3-3 protein FTT2	Q7X7A7	erb14 / FTT2		û	û	Signal transduction
Calcium-dependent protein kinase	A8IHF4	CrCDPK1				Signal transduction
Carbohydrate kinase-like protein	A8IGY9	CGL79
COP signalosome subunit 5	A8J0K7	CSN5				Signal transduction
Dehydroascorbate reductase	A8I0K9
Glutaredoxin, CGFS type	A8JIA7	GRX4
Glutaredoxin, CPYC type	A8IYH1	GRX2			û
Glutathione reductase	A8J0E5	GSHR2
Glutathione S-transferase	A8JEB2
Mitogen-activated protein kinase 8	Q9FXT7	MAPK8				Signal transduction
Nucleoredoxin 1	A8I9L1	NRX1			û
Peroxiredoxin type II	A8HZQ4	PRX3
Protein kinase C binding protein	A8HVN9					Signal transduction
Protein phosphatase 2C	A8J0N4					Signal transduction
Protein phosphatase 5-like protein	A8IHM8					Signal transduction
Protein ser/thr phosphatase	A8IRJ2					Signal transduction
Rhodanese domain phosphatase	A8IUB5	RDP3				Signal transduction
RNA-binding protein C3, CELF family	A8IDT8	CRB3				Circadian rythm
Ser/thr protein kinase	A8I169					Signal transduction
Serine/threonine protein kinase 9	A8IA26	STPK9				Signal transduction
Serine/threonine protein phosphatase	A8HXX4					Signal transduction
Serine/threonine-protein phosphatase PP2A-3 catalytic subunit	A8J1A2	PP2A3				Signal transduction
Snf1-like protein kinase	Q9ZSM9	SAC3				Signal transduction
Snf1-like ser/thr protein kinase	A8JFM9					Signal transduction
Thioredoxin o	Q84XS0	TRXo			û
Thioredoxin-like ATP binding protein 2	A8HMA7
Zinc finger protein, RING-type	A8IE95
Glutathione S-transferase	A8JBE2	GST3
High light-induced nuclease	A8HN65	HLA8
Serine/threonine phosphatase, family 2C	A8HY41	PPP20				Signal transduction
Serine/threonine-protein phosphatase 2, catalytic subunit	A8JBP0	PP2A				Signal transduction
